# Supplementary material
Source: PubMed Central journal article supplement (PMC1500856)
Supplement: 7601159s2.pdf [file 7601159s2.pdf]

**Supplementary Table 1. Summary of the yeast three screen to identify Mos 3' UTR-specific RNA binding proteins**

The yeast three hybrid system was used to screen a *Xenopus laevis* pACT2 unfertilized egg cDNA library (Clontech) for proteins which specifically interacted with the last 48 nucleotides of the CPE-disrupted M1 48 Mos 3' UTR. In total,  $1.3 \times 10^7$  initial transformants were screened (a 3.6 fold excess of the number of cDNA clones in the library) to ensure complete representation of the all the library clones. The final 20 yeast colonies after selection were found to encode eight distinct *Xenopus* cDNAs. When the eight distinct cDNAs were reintroduced back into the three hybrid assay, only two of the original eight distinct cDNAs were able to reconstitute Mos M1 48 specific RNA interaction.

*Mos 3' UTR yeast three hybrid screen*

| <b>Procedure</b>                        | <b>number of clones</b> |
|-----------------------------------------|-------------------------|
| Total transformants                     | $1.3 \times 10^7$       |
| RNA plasmid-containing, HIS3 activation | 530                     |
| RNA dependence (FOA counter selection)  | 271                     |
| Binding specificity by mating           | 20                      |
| Distinct cDNAs                          | 8                       |
